# Supplementary material for: Development of an azo functionalized oligomeric chitosan sensor for rapid visual, spectrophotometric and spectrofluorometric detection of KMnO4 up to micromolar concentrations
Source: Royal Society of Chemistry journal article supplement (doi:10.1039/d2an01873j), 2022-12-19
Supplement: d2an01873j1.pdf [file d2an01873j1.pdf]

Electronic Supplementary Information

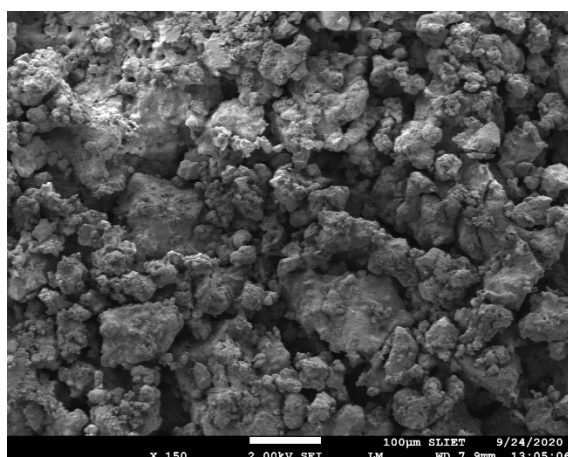

Fig S1: SEM image of  $\beta$ -NAC

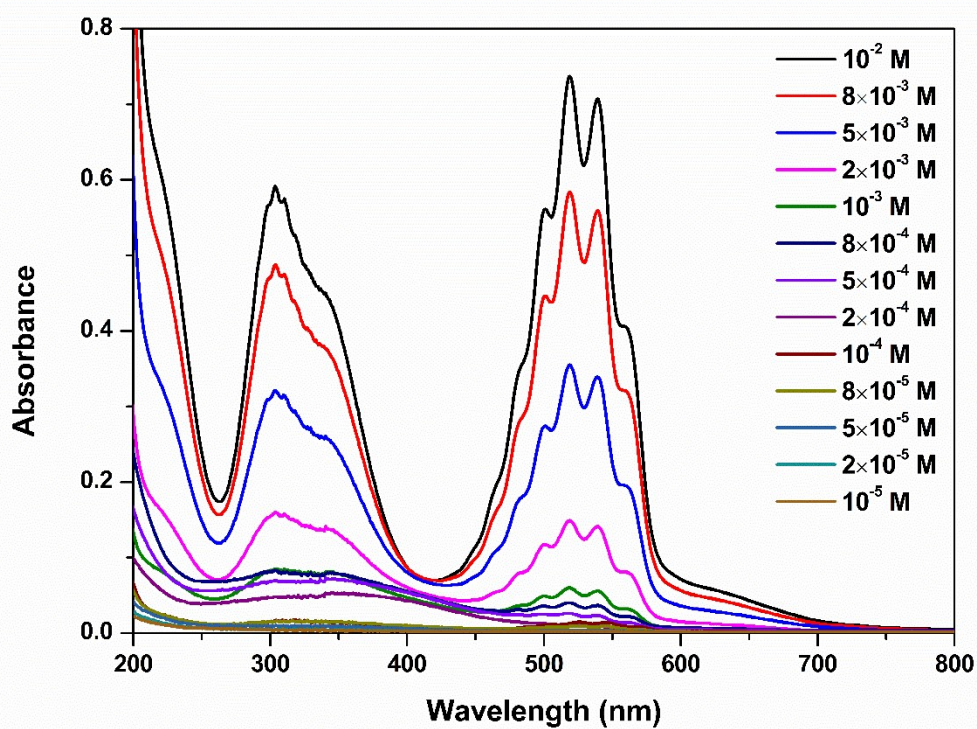

Fig S2: Absorption spectra of  $\text{KMnO}_4$  ( $10^{-2}$ - $10^{-5}$  M)

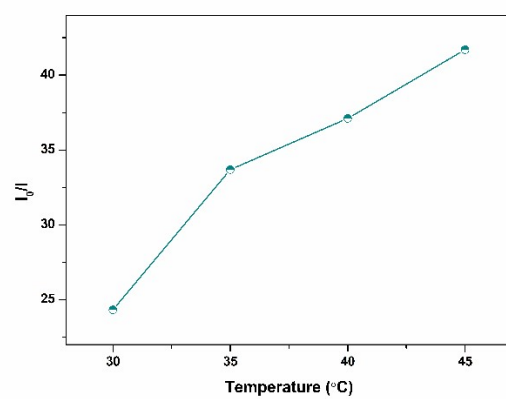

Fig S3: Temperature effect on fluorescence quenching of  $\beta$ -NAC
